# Supplementary material for: Structure and nucleic-acid binding of the Drosophila Argonaute 2 PAZ domain
Source: Springer Nature journal article supplement (doi:10.1038/nature02123), 2003-11-01
Supplement: 41586_2003_BFnature02123_MOESM1_ESM.pdf [file 41586_2003_BFnature02123_MOESM1_ESM.pdf]

**Figure S1** Multiple sequence alignment of PAZ domains.

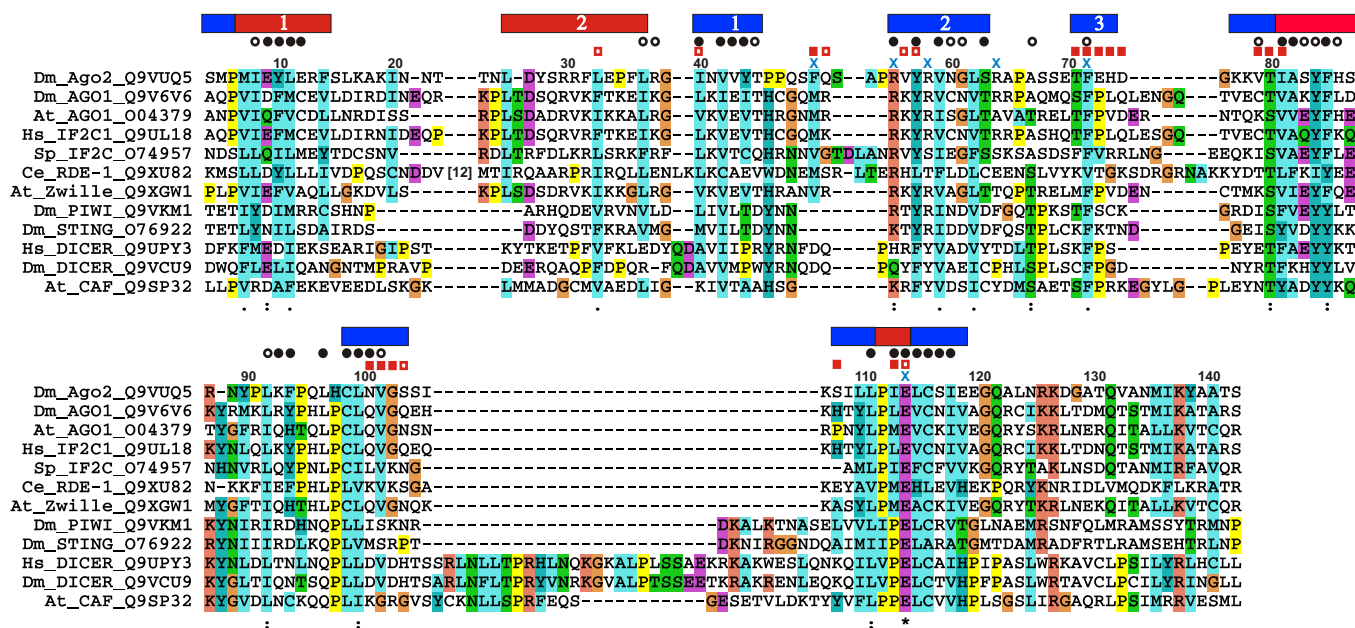

Accession numbers are indicated on the left. Abbreviations are: Dm *Drososiphila melanogaster*, At *Arabidopsis thaliana*, Hs *Homo sapiens*, Sp *Schizosaccharomyces pombe*. Residue numbers, secondary structure, protein-RNA contacts (open/filled red squares for medium/strong chemical shift perturbation, see Fig. 2c,d), and solvent-protected amide protons (open/filled circles for medium/slow H/D exchange in NMR measurements) and mutations (blue “X”) are shown on top. Partial, high or complete residue conservations are shown below the alignment with “.”, “:” and “\*” and residues are color-coded according to CLUSTALX (Jeanmougin, F., Thompson, J. D., Gouy, M., Higgins, D. G. & Gibson, T. J. Trends Biochem. Sci. 1998, 23, 403-5).

Note, that residues 120-143, following the last strand ( 7) are unstructured even in protein constructs extended N- and C-terminally, and a PAZ domain comprising residues 1-123 is structurally intact (data not shown).
