# Supplementary material for: Structure and nucleic-acid binding of the Drosophila Argonaute 2 PAZ domain
Source: Springer Nature journal article supplement (doi:10.1038/nature02123), 2003-11-01

**Figure S4** NMR titration experiments.

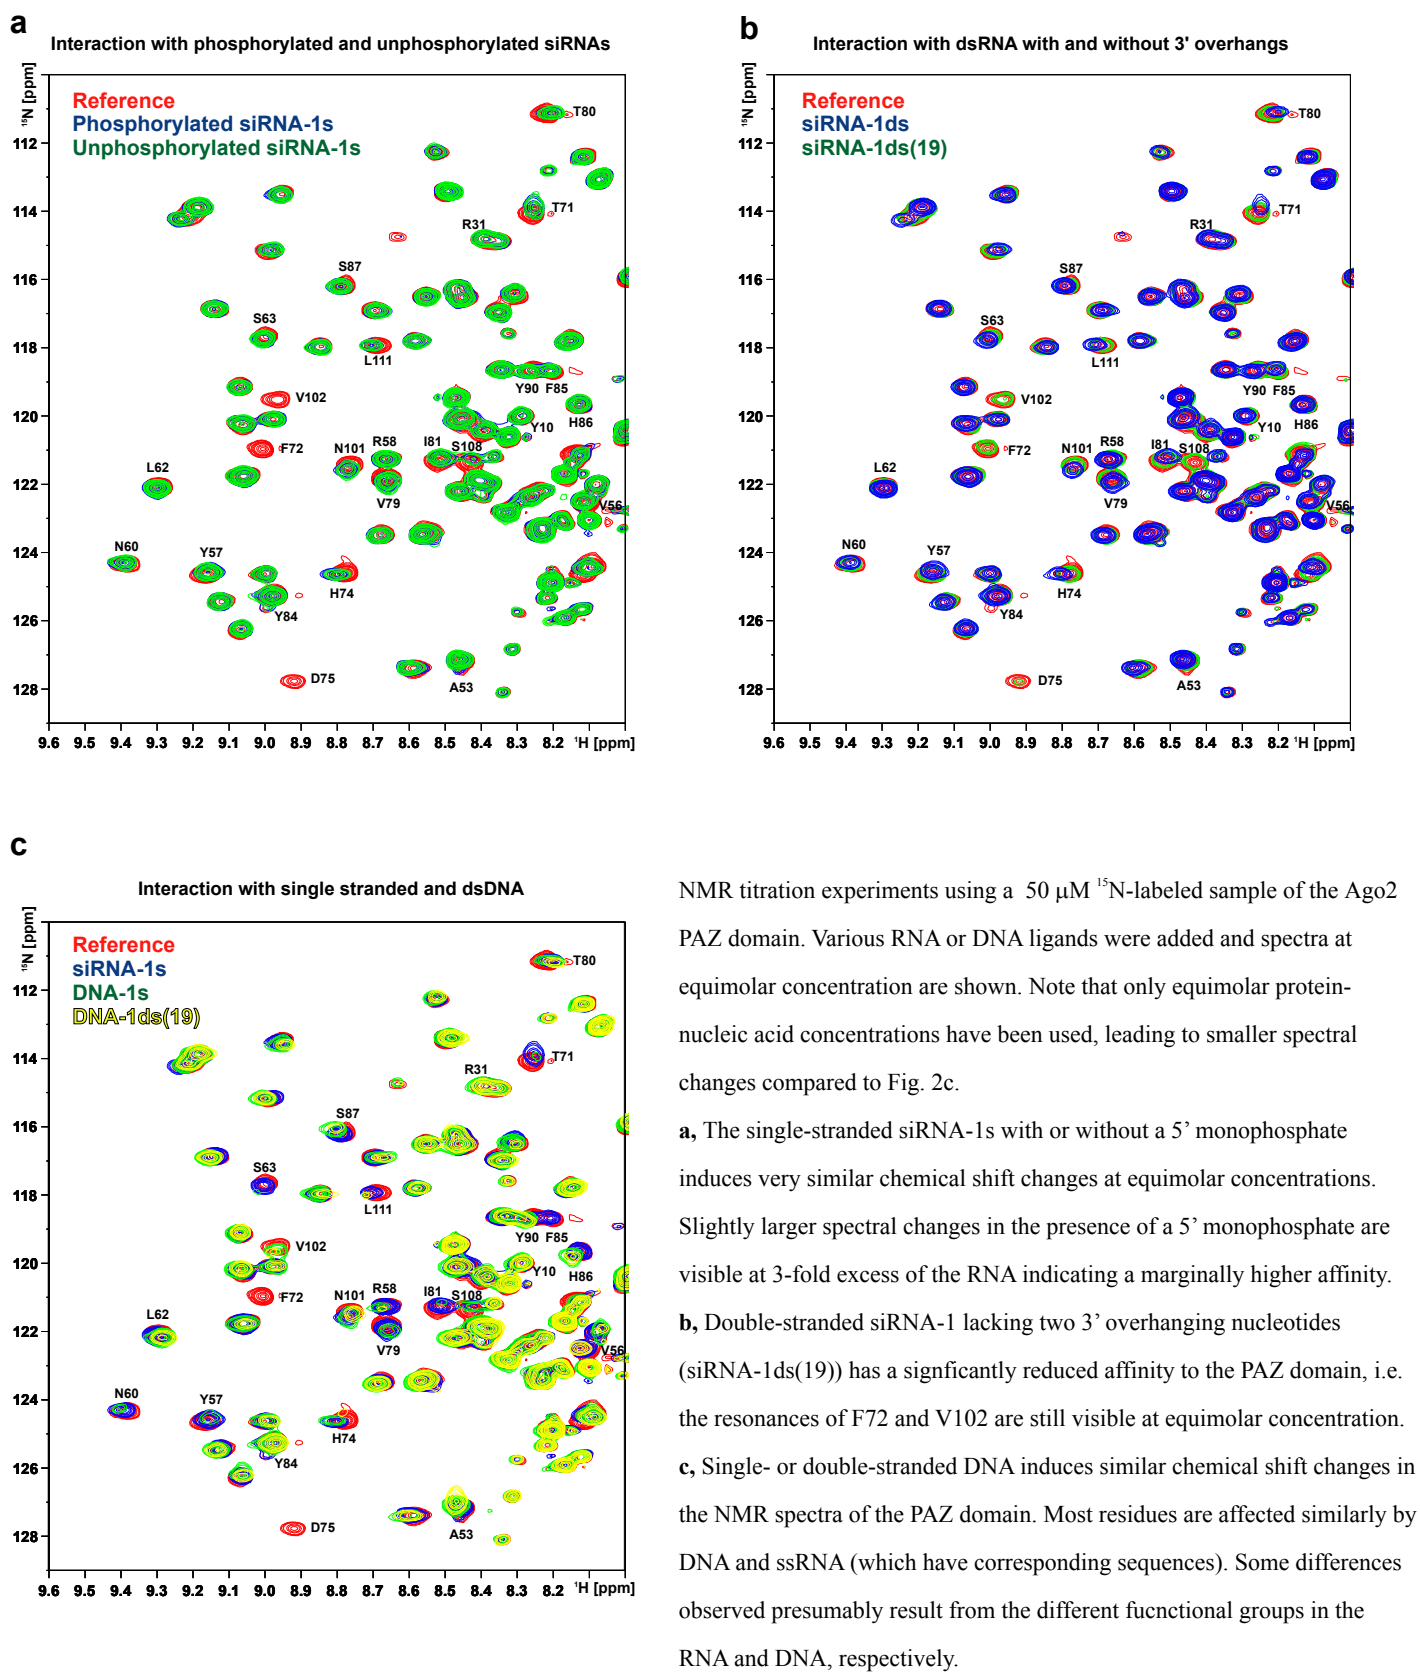

Supplement: 41586_2003_BFnature02123_MOESM4_ESM.pdf [file 41586_2003_BFnature02123_MOESM4_ESM.pdf]
