# Supplementary material for: Structure and nucleic-acid binding of the Drosophila Argonaute 2 PAZ domain
Source: Springer Nature journal article supplement (doi:10.1038/nature02123), 2003-11-01
Supplement: 41586_2003_BFnature02123_MOESM5_ESM.pdf [file 41586_2003_BFnature02123_MOESM5_ESM.pdf]

**Figure S5** Binding specificity of Ago2.

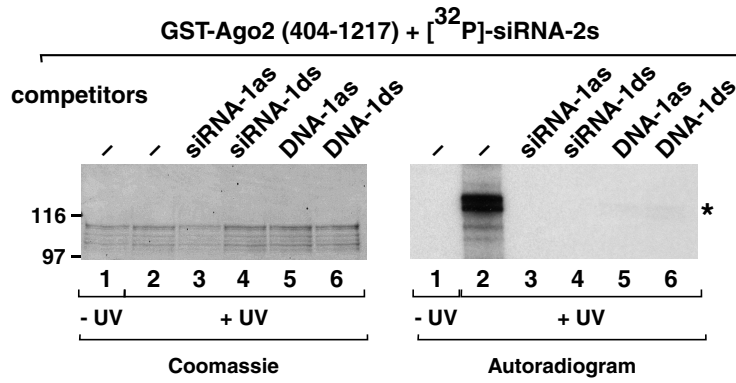

A fragment of Dm Ago2 encompassing residues 404-1217 was incubated with [ $^{32}$ P]-end-labeled siRNA-2s (<5 nM) in the absence (lanes 1 and 2) or presence of the competitors indicated above the lanes (100  $\mu$ M). The position of the siRNA-2s/protein adducts (asterisk) is shown on the right. Several bands are observed due to the partial degradation of the protein as shown in the Coomassie stained gel.
