# Supplementary material for: Structure and nucleic-acid binding of the Drosophila Argonaute 2 PAZ domain
Source: Springer Nature journal article supplement (doi:10.1038/nature02123), 2003-11-01
Supplement: 41586_2003_BFnature02123_MOESM6_ESM.pdf [file 41586_2003_BFnature02123_MOESM6_ESM.pdf]

**Table S1:** Sequences of nucleic acids used for binding studies.

| Name of oligo | Sequence                                                    |
|---------------|-------------------------------------------------------------|
| siRNA-1s      | GGU GUU CAA GCC AAA GGC GUU                                 |
| siRNA-1as     | CGC CUU UGG CUU GAA CAC CUU                                 |
| siRNA-1ds     | GGU GUU CAA GCC AAA GGC GUU<br>UU CCA CAA GUU CGG UUU CCG C |
| siRNA-1ds(19) | GGU GUU CAA GCC AAA GGC G<br>CCA CAA GUU CGG UUU CCG C      |
| siRNA-2s      | GCA GCA CGA CUU CUU CAA GTT                                 |
| siRNA-2as     | CUU GAA GAA GUC GUG CUG CTT                                 |
| T1-RNA        | ACG GGC UCA UAA CCC GU                                      |
| H1-RNA        | GGA AGG CCC UUU UCA GGG CCA CCC                             |
| DNA-1s        | GGT GTT CAA GCC AAA GGC GTT                                 |
| DNA-1as       | CGC CTT TGG CTT GAA CAC CTT                                 |
| DNA-1ds       | GGT GTT CAA GCC AAA GGC GTT<br>TT CCA CAA GTT CGG TTT CCG C |
| DNA-1ds(19)   | GGT GTT CAA GCC AAA GGC G<br>CCA CAA GTT CGG TTT CCG C      |
